# Supplementary material for: Keeping It Real: Substantive Learning on a Short Calendar
Source: Atypon-hosted journal article supplement (doi:10.1187/cbe.07-05-0024), 2007-12-01
Supplement: appendix_a.pdf [file appendix_a.pdf]

## Appendix A. “Introduction to Microbiology” in eighteen days

### Course goals:

By the end of this course you will:

1. Have an appreciation for diversity in the microbial world
2. Understand how structure and function are interrelated in molecular biology
3. Understand horizontal gene transfer and the evolution of antibiotic resistance
4. Understand the basic properties of human immunity and microbial pathogenesis
5. Be able to grow pure cultures of bacteria using good aseptic technique
6. Be able to design and test a hypothesis using standard microbiological techniques
7. Be able to write a professional laboratory report in the format of a formal research publication
8. Be able to identify a microbiologist’s thesis and summarize her/his argument
9. Be able to develop and defend your own thesis
10. Be able to use Tutt Library resources to complete a major researched project (on Your Favorite Microbe, i.e. “YFM”)
11. Be able to create and deliver a thesis-centered oral seminar on YFM

| <u>Day</u> | <u>Morning</u>                                              | <u>Afternoon</u>           | <u>Due</u>                |
|------------|-------------------------------------------------------------|----------------------------|---------------------------|
| 1          | Welcome; investigative biofilm lab begins                   | Continue lab               |                           |
| 2          | Introduction to microbiology                                | Continue lab               |                           |
| 3          | Microbial diversity & history                               | Continue lab               | YFM stage 1               |
| 4          | Cultivation & identification; bacterial motility            | PL available for questions |                           |
| 5          | Exam 1                                                      |                            |                           |
| 6          | Lab check-in with instructor                                | Design biofilm project     | YFM stage 2               |
| 7          | Structural features of prokaryotes                          | Work on biofilm project    |                           |
| 8          | Bacterial genetics                                          | Work on biofilm project    |                           |
| 9          | Genetics continues; antibiotics and antibiotic resistance   | PL available for questions |                           |
| 10         | Exam 2                                                      |                            |                           |
| 11         | Horizontal gene transfer                                    | Work on biofilm project    | YFM stage 3               |
| 12         | Work on biofilm project                                     |                            |                           |
| 13         | Human microbiota & immunity                                 | Finish biofilm project     |                           |
| 14         | Human immunity & pathogenesis                               | PL available for questions | YFM stage 4               |
| 15         | Pathogenesis case study                                     |                            | Stage 1 of lab report     |
| 16         | Work Day! Collect comments on your lab report at 10:00 a.m. |                            |                           |
| 17         | YFM presentations                                           |                            | Full (revised) lab report |
| 18         | Final exam (class ends at noon)                             |                            |                           |
