# Supplementary material for: Keeping It Real: Substantive Learning on a Short Calendar
Source: Atypon-hosted journal article supplement (doi:10.1187/cbe.07-05-0024), 2007-12-01
Supplement: appendix_b.pdf [file appendix_b.pdf]

**Appendix B. BY463 as an example of a seminar-style majors' elective.**

**Course goals:** Through discussion and writing, students will demonstrate increased facility with and confidence in ...

1. Reading and understanding primary research literature
2. Critiquing primary research literature
3. Writing concise, summative critiques of primary research literature

Through researching and writing a mock grant proposal, students will ...

1. Identify a contemporary research question of importance to a specific Principal Investigator (PI)
2. Propose and justify experiments to address this research question
3. Critique other students' ideas in conversation and in writing

**Daily schedule:**

| Day | Topic                         | Assignments due                          | PI to read |
|-----|-------------------------------|------------------------------------------|------------|
| 1   | Welcome                       |                                          |            |
| 2   | Bacterial cytoskeleton        |                                          | Errington  |
| 3   |                               | Grant Proposal Stage 1                   |            |
| 4   | Replication in <i>E. coli</i> |                                          | Beckwith   |
| 5   |                               | Grant Proposal Stage 2                   |            |
| 6   | Starvation physiology         | Critique (Errington or Beckwith)         | Finkel     |
| 7   |                               |                                          |            |
| 8   | Stress response               |                                          | Gross      |
| 9   |                               |                                          |            |
| 10  | Quorum sensing                | Grant Proposal Stage 3                   | Bassler    |
| 11  | Metagenomics                  | Critique (Finkel, Gross or Bassler)      | Handelsman |
| 12  |                               |                                          |            |
| 13  | Comparative genomics          |                                          | Fraser     |
| 14  |                               |                                          |            |
| 15  | Pathogenesis                  | Grant Proposal Stage 4                   | Cossart    |
| 16  |                               | Critique (Handelsman, Fraser or Cossart) |            |
| 17  | Grants workshop               | Grant Proposal Stage 5                   |            |
| 18  | Grant Proposal                | Course evals; Grant Proposal             |            |
